# Supplementary material for: Covalent chemical functionalization of Ti3C2Tx MXene nanosheets with fullerenes C60 and C70 for enhanced nonlinear optical limiting
Source: Royal Society of Chemistry journal article supplement (doi:10.1039/d3tc00868a), 2023-01-01
Supplement: d3tc00868a1.pdf [file d3tc00868a1.pdf]

Supporting Information for

Covalent chemical functionalization of  $\text{Ti}_3\text{C}_2\text{T}_x$   
MXene nanosheets with fullerenes  $\text{C}_{60}$  and  $\text{C}_{70}$  for  
enhanced nonlinear optical limiting

*Yan Fang,<sup>†</sup> Zhiyuan Wei,<sup>†</sup> Zihao Guan,<sup>†</sup> Naying Shan,<sup>†</sup> Yang Zhao,<sup>†</sup> Fang Liu,<sup>†</sup> Lulu Fu,<sup>†</sup> Zhipeng  
Huang,<sup>†</sup> Mark G. Humphrey,<sup>‡</sup> Chi Zhang\*,<sup>†</sup>*

<sup>†</sup> China-Australia Joint Research Center for Functional Molecular Materials, School of Chemical  
Science and Engineering, Tongji University, Shanghai 200092, China

<sup>‡</sup> Research School of Chemistry, Australian National University, Canberra, ACT 2601, Australia

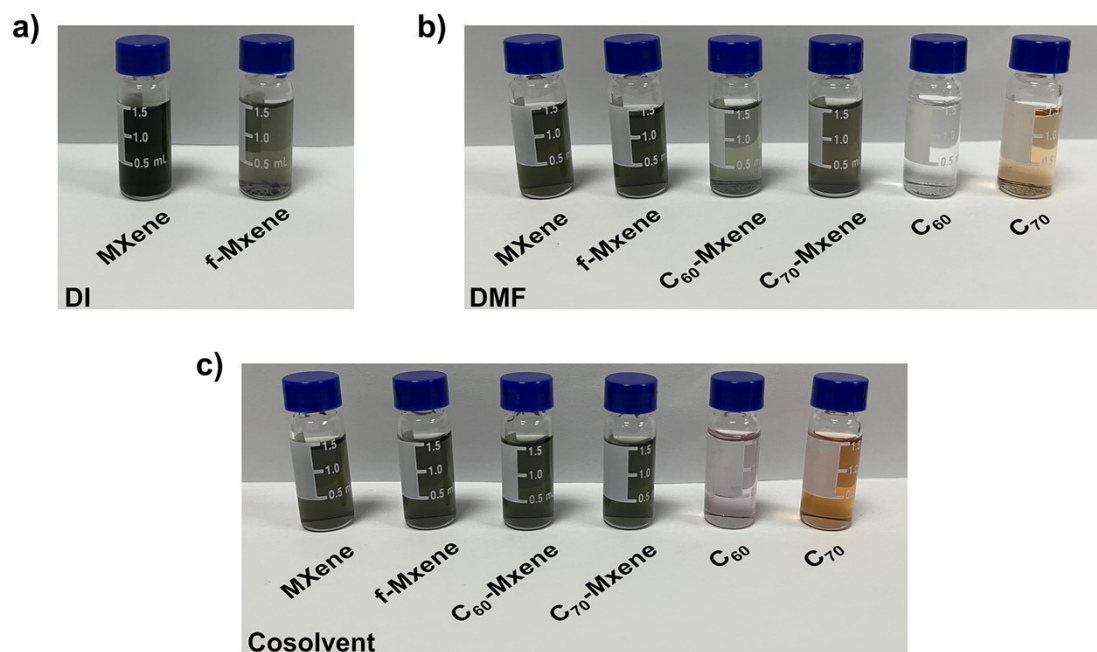

**Figure S1.** a) Photographs of MXene and f-MXene dispersions, with deionized water (DI) as the solvent. b) Photographs of MXene, f-MXene, C<sub>60</sub>-MXene, and C<sub>70</sub>-MXene dispersions, as well as C<sub>60</sub> and C<sub>70</sub> solutions, with N, N-dimethylformamide (DMF) as the solvent. c) Photographs of MXene, f-MXene, C<sub>60</sub>-MXene, and C<sub>70</sub>-MXene dispersions, as well as C<sub>60</sub> and C<sub>70</sub> solutions, with the cosolvent (DMF/Toluene = 2 : 1, volume ratio) as the solvent. MXene-based samples are all at the same concentration of 0.1 mg ml<sup>-1</sup>. C<sub>60</sub> and C<sub>70</sub> solutions are with a concentration of 0.5 mg ml<sup>-1</sup>.

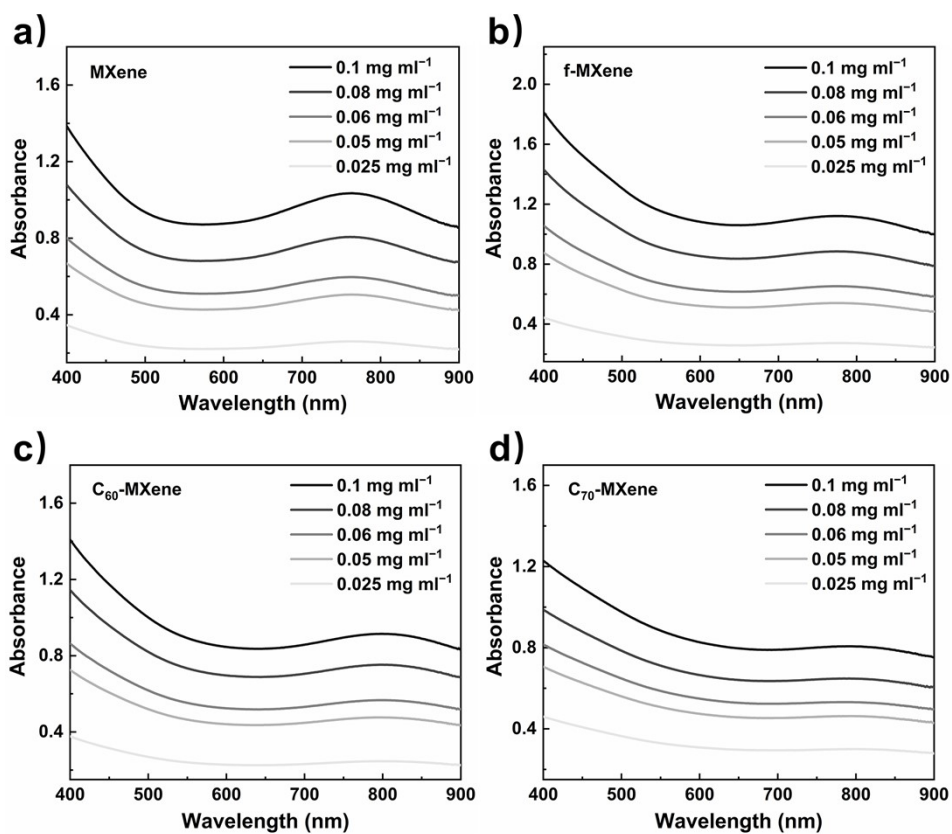

**Figure S2.** Concentration dependence of absorption spectra of a) MXene, b) f-MXene, c) C<sub>60</sub>-MXene, and d) C<sub>70</sub>-MXene in the cosolvent.

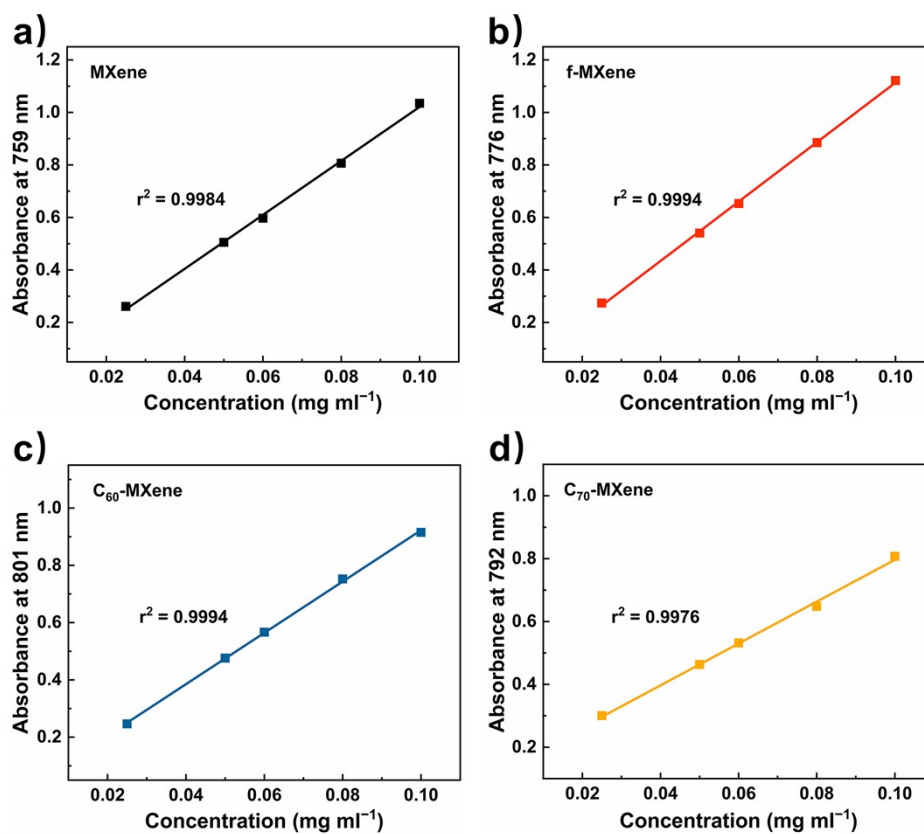

**Figure S3.** The absorbance of a) MXene, b) f-MXene, c)  $C_{60}$ -MXene, and d)  $C_{70}$ -MXene at different concentrations at their respective peak position around 800 nm. The straight lines are the linear fitting results of the data.

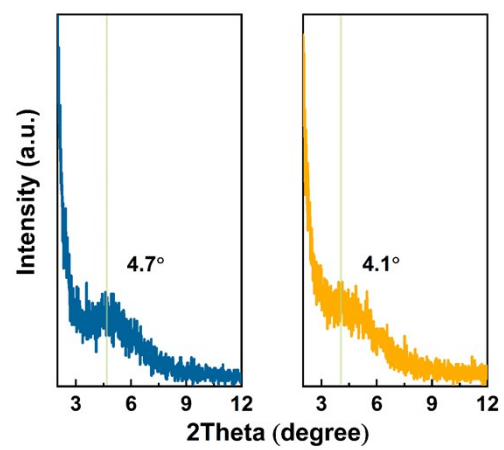

**Figure S4.** Low-angle XRD results for a) C<sub>60</sub>-MXene and b) C<sub>70</sub>-MXene.

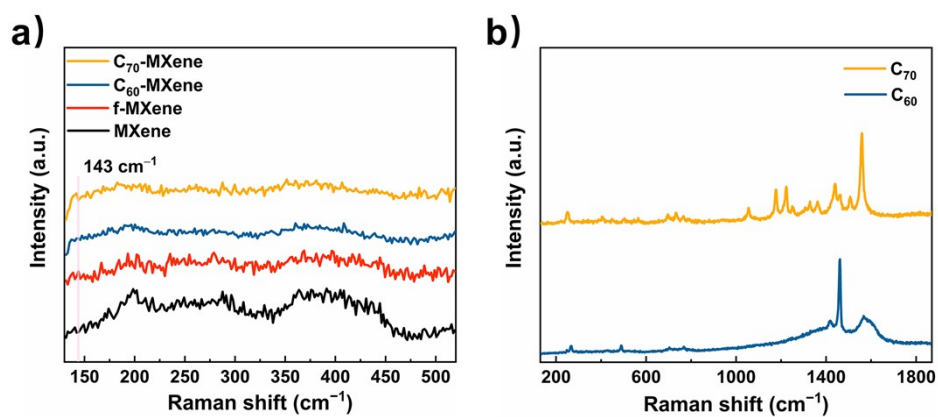

**Figure S5.** a) Raman spectra of MXene, f-MXene, C<sub>60</sub>-MXene, and C<sub>70</sub>-MXene in the low-wavenumber region, and an absence of signal at 143 cm<sup>-1</sup> in all samples indicates a negligible existence of TiO<sub>2</sub>. b) Raman spectra of fullerenes C<sub>60</sub> and C<sub>70</sub>.

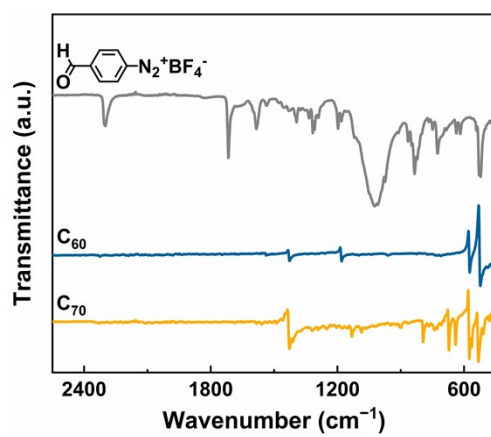

**Figure S6.** ATR-IR spectra of 4-benzaldehyde diazonium tetrafluoroborate, C<sub>60</sub>, and C<sub>70</sub>.

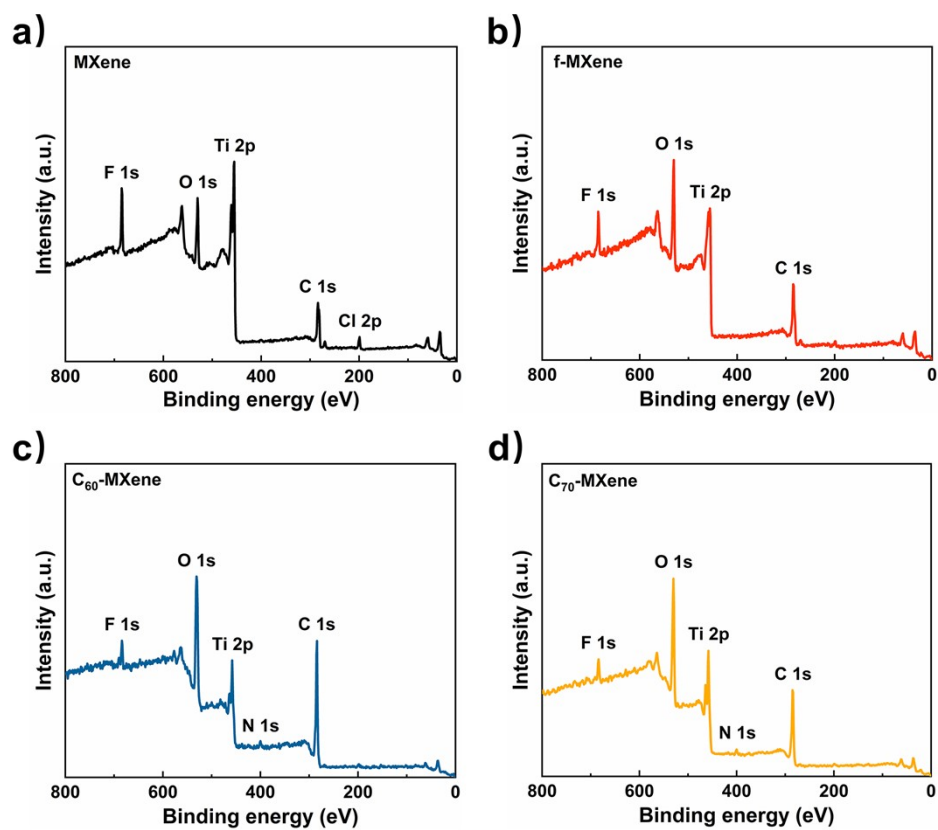

**Figure S7.** XPS survey spectra of a) MXene, b) f-MXene, c) C<sub>60</sub>-MXene, and d) C<sub>70</sub>-MXene.



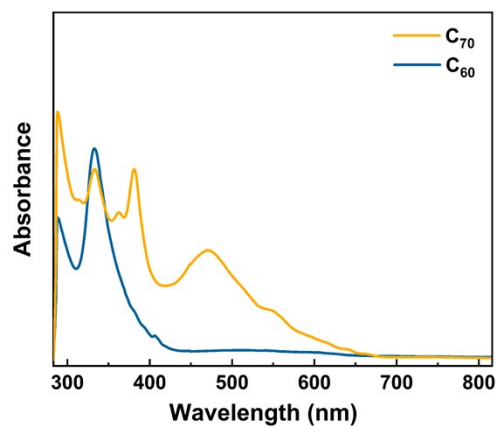

**Figure S8.** The absorption spectra of fullerenes C<sub>60</sub> and C<sub>70</sub>.

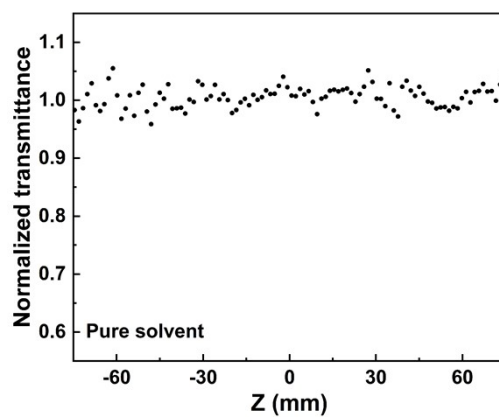

**Figure S9.** Z-scan data of pure solvent under the ns laser with an input intensity of 105  $\mu\text{J}$ .

**Section S1.** Data fitting of Z-scan curves.

The total absorption coefficient of a given material can be written as

$$\alpha(I) = \alpha_0 + \beta I, \quad (\text{Equation S1})$$

where  $\alpha_0$  and  $\beta$  correspond to linear absorption coefficient and nonlinear absorption coefficient, respectively.  $I$  is the incident light intensity. The light propagation model in the measured sample can be expressed as<sup>1</sup>

$$\frac{dI}{dz} = -(\alpha_0 + \beta I)I, \quad (\text{Equation S2})$$

For the open-aperture Z-scan technique, the normalized transmittance is given as<sup>1</sup>

$$T(z) = \sum_{m=0}^{\infty} \frac{\left[ \frac{-\beta I_0 L_{eff}}{1 + z^2/z_0^2} \right]^m}{(m+1)^{3/2}}, \quad (\text{Equation S3})$$

where  $L_{eff} = (1 - e^{-\alpha_0 L})/\alpha_0$  is the effective interaction length,  $\alpha_0$  stands for the linear absorption coefficient,  $L$  is the sample thickness,  $\beta$  is the nonlinear absorption coefficient,  $I_0$  is the on-axis peak laser intensity at the focal point, and  $z_0$  is the Rayleigh diffraction length.

By fitting the experimental Z-scan points,  $\beta$  can be obtained. The imaginary part of the third-order nonlinear susceptibility ( $Im\chi^{(3)}$ ) is calculated according to<sup>2</sup>

$$Im\chi^{(3)} = \left[ \frac{10^{-7} C \lambda n^2}{96\pi^2} \right] \beta, \quad (\text{Equation S4})$$

where  $C$  is the speed of light,  $\lambda$  is the excitation wavelength, and  $n$  is the refractive index.

For obtaining the nonlinear refractive index ( $n_2$ ), the closed-aperture Z-scan data is fitted with the formula<sup>1</sup>

$$T_{close/open} = 1 + \frac{4(z/z_0)\Delta\phi}{(z^2/z_0^2 + 9)(z^2/z_0^2 + 1)}, \quad (\text{Equation S5})$$

where  $T_{close/open}$  is the normalized transmittance for the sample at the  $z$  point and  $\Delta\phi = 2\pi n_2 I_0 L_{eff}/\lambda$  stands for the nonlinear phase shift.

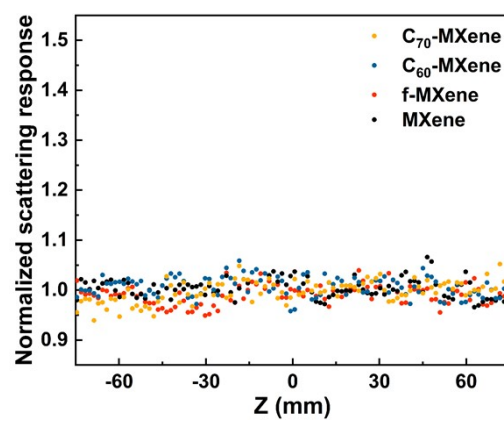

**Figure S10.** Z-scan scattering results of MXene, f-MXene, C<sub>60</sub>-MXene, and C<sub>70</sub>-MXene dispersions under ns pulses with a fluence energy of 105  $\mu\text{J}$ .

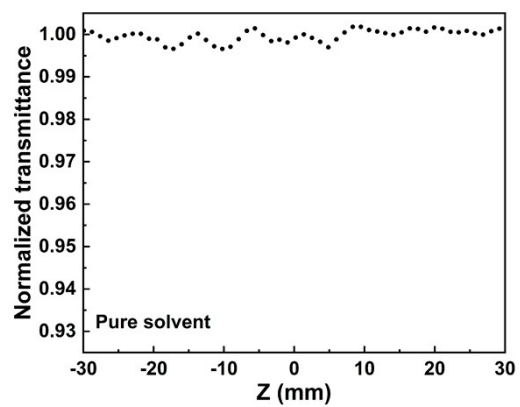

**Figure S11.** Z-scan data of pure solvent under the fs laser with an input intensity of 136 nJ.

**Table S1.** Nonlinear optical parameters of measured samples based on the fitting of open-aperture Z-scan data.

| Samples                | Laser  | $E_{\text{pulse}}$ ( $\mu\text{J}$ ) | $T_0$ | $\beta$ ( $\text{cm GW}^{-1}$ )  | $\text{Im}\chi^{(3)}$ ( $\times 10^{-11}$ esu) |
|------------------------|--------|--------------------------------------|-------|----------------------------------|------------------------------------------------|
| MXene                  |        |                                      | 0.72  | $34.9 \pm 1.9$                   | $1.23 \pm 0.07$                                |
| f-MXene                |        |                                      | 0.73  | $31.0 \pm 1.7$                   | $1.09 \pm 0.06$                                |
| C <sub>60</sub>        | 532 nm | 105                                  | 0.76  | $26.2 \pm 1.2$                   | $0.92 \pm 0.04$                                |
| C <sub>70</sub>        | 12 ns  |                                      | 0.69  | $41.7 \pm 1.5$                   | $1.46 \pm 0.05$                                |
| C <sub>60</sub> /MXene | 10 Hz  |                                      | 0.72  | $35.8 \pm 2.5$                   | $1.26 \pm 0.09$                                |
| C <sub>70</sub> /MXene |        |                                      | 0.69  | $45.7 \pm 2.5$                   | $1.61 \pm 0.09$                                |
| C <sub>60</sub> -MXene |        |                                      | 0.59  | $74.9 \pm 1.8$                   | $2.63 \pm 0.06$                                |
| C <sub>70</sub> -MXene |        |                                      | 0.60  | $70.0 \pm 1.8$                   | $2.46 \pm 0.06$                                |
| MXene                  |        |                                      | 0.95  | $(1.70 \pm 0.07) \times 10^{-3}$ | $(0.97 \pm 0.04) \times 10^{-4}$               |
| f-MXene                |        |                                      | 0.95  | $(1.81 \pm 0.06) \times 10^{-3}$ | $(1.03 \pm 0.03) \times 10^{-4}$               |
| C <sub>60</sub>        | 800 nm | $136 \times 10^{-3}$                 | —     | —                                | —                                              |
| C <sub>70</sub>        | 34 fs  |                                      | —     | —                                | —                                              |
| C <sub>60</sub> /MXene | 1 kHz  |                                      | 0.95  | $(1.54 \pm 0.06) \times 10^{-3}$ | $(0.88 \pm 0.03) \times 10^{-4}$               |
| C <sub>70</sub> /MXene |        |                                      | 0.95  | $(1.82 \pm 0.05) \times 10^{-3}$ | $(1.03 \pm 0.03) \times 10^{-4}$               |
| C <sub>60</sub> -MXene |        |                                      | 0.93  | $(3.26 \pm 0.09) \times 10^{-3}$ | $(1.85 \pm 0.05) \times 10^{-4}$               |
| C <sub>70</sub> -MXene |        |                                      | 0.93  | $(2.80 \pm 0.12) \times 10^{-3}$ | $(1.59 \pm 0.07) \times 10^{-4}$               |

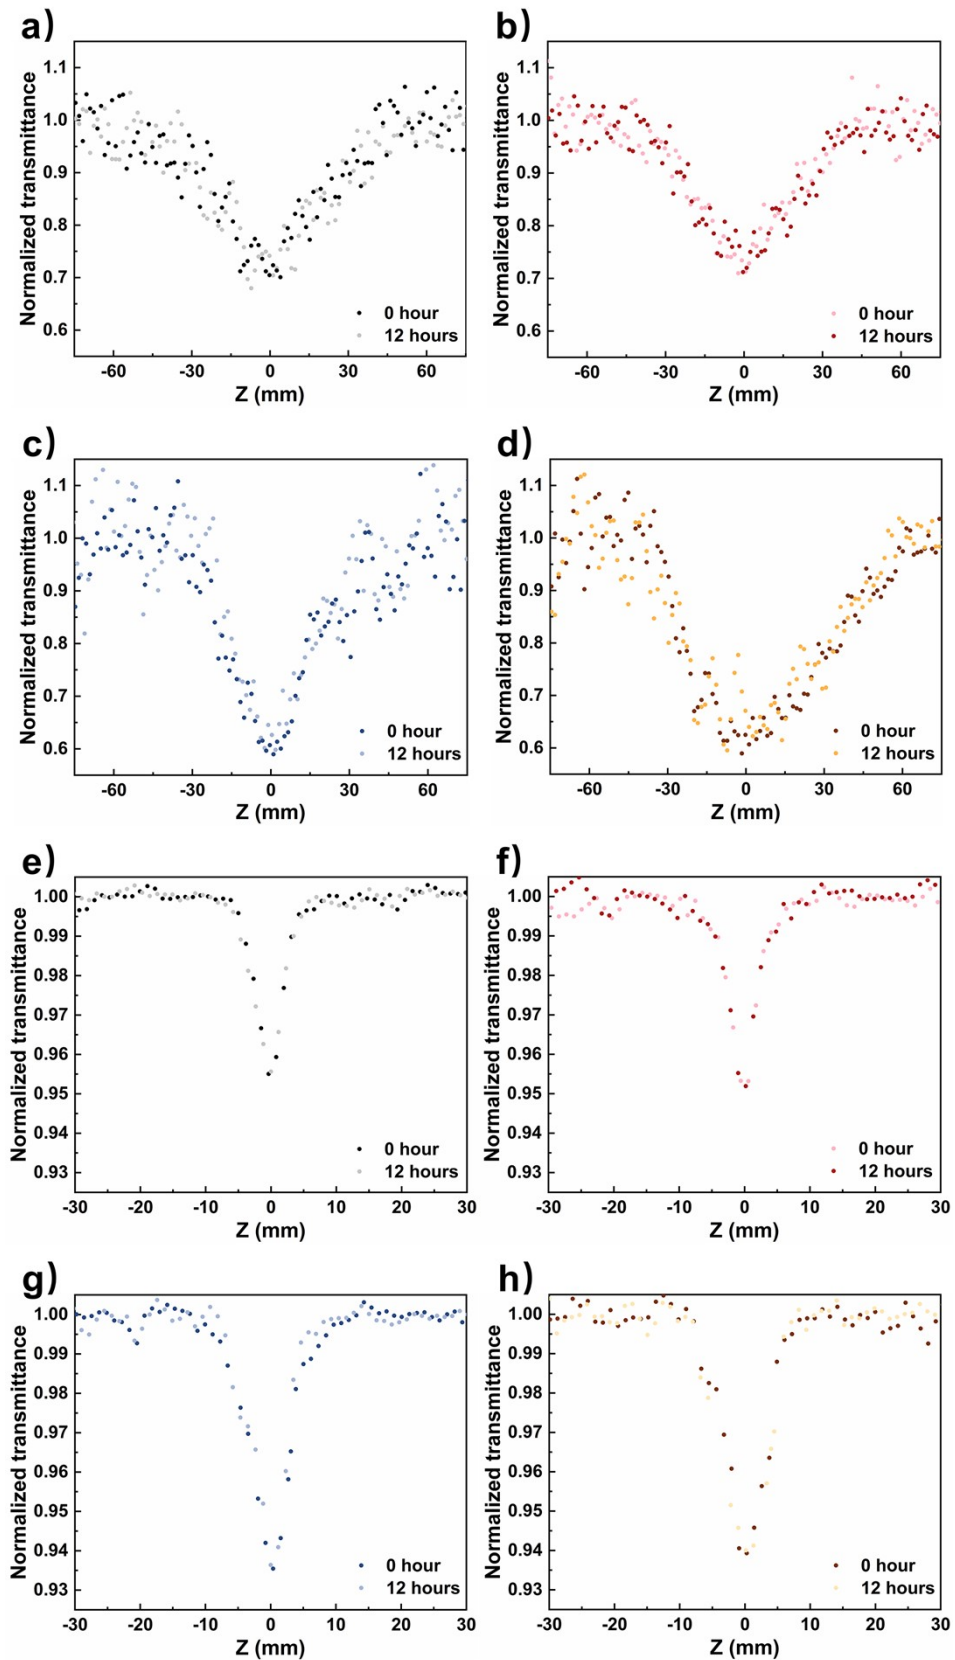

**Figure S12.** Z-scan results of a) MXene, b) f-MXene, c) C<sub>60</sub>-MXene, and d) C<sub>70</sub>-MXene under the ns laser with an input energy of 105  $\mu$ J. e), f), g), and h) are Z-scan results of MXene, f-MXene, C<sub>60</sub>-MXene, and C<sub>70</sub>-MXene, respectively, under the fs laser with an input energy of 136 nJ.

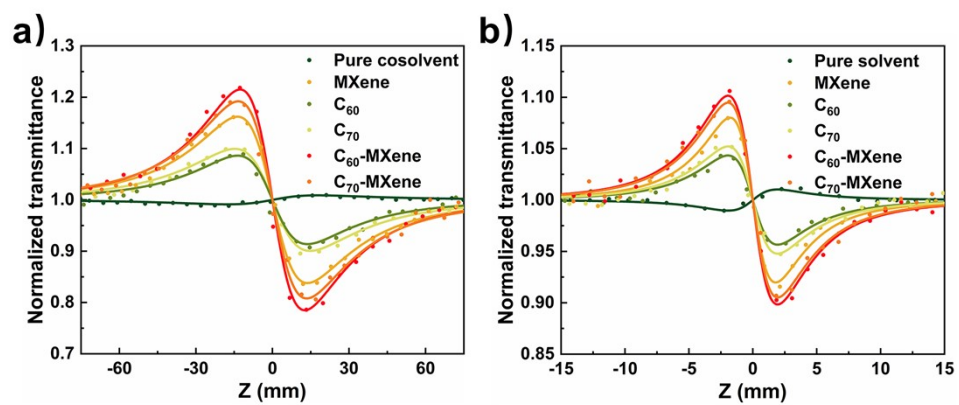

**Figure S13.** The results of closed-aperture Z-scan measurements under a) ns pulses at 532 nm with the input energy of 105 μJ and b) fs pulses at 800 nm with the input energy of 136 nJ. Solid lines are fitted curves.



**Table S2.** The nonlinear refractive indexes ( $n_2$ ) of measured samples based on the fitting of closed-aperture Z-scan data.

| Samples                | Laser  | $E_{\text{pulse}}$ ( $\mu\text{J}$ ) | $n_2$ ( $\times 10^{-3} \text{ cm}^2 \text{ GW}^{-1}$ ) |
|------------------------|--------|--------------------------------------|---------------------------------------------------------|
| MXene                  |        |                                      | $-2.23 \pm 0.16$                                        |
| C <sub>60</sub>        | 532 nm |                                      | $-1.19 \pm 0.07$                                        |
| C <sub>70</sub>        | 12 ns  | 105                                  | $-1.47 \pm 0.09$                                        |
| C <sub>60</sub> -MXene | 10 Hz  |                                      | $-2.73 \pm 0.09$                                        |
| C <sub>70</sub> -MXene |        |                                      | $-2.59 \pm 0.08$                                        |
| Pure solvent           |        |                                      | $0.16 \pm 0.01$                                         |
| MXene                  |        |                                      | $(-7.60 \pm 0.23) \times 10^{-4}$                       |
| C <sub>60</sub>        | 800 nm |                                      | $(-3.34 \pm 0.21) \times 10^{-4}$                       |
| C <sub>70</sub>        | 34 fs  | $136 \times 10^{-3}$                 | $(-4.02 \pm 0.39) \times 10^{-4}$                       |
| C <sub>60</sub> -MXene | 1 kHz  |                                      | $(-9.82 \pm 0.53) \times 10^{-4}$                       |
| C <sub>70</sub> -MXene |        |                                      | $(-7.91 \pm 0.55) \times 10^{-4}$                       |
| Pure solvent           |        |                                      | $(0.79 \pm 0.06) \times 10^{-4}$                        |

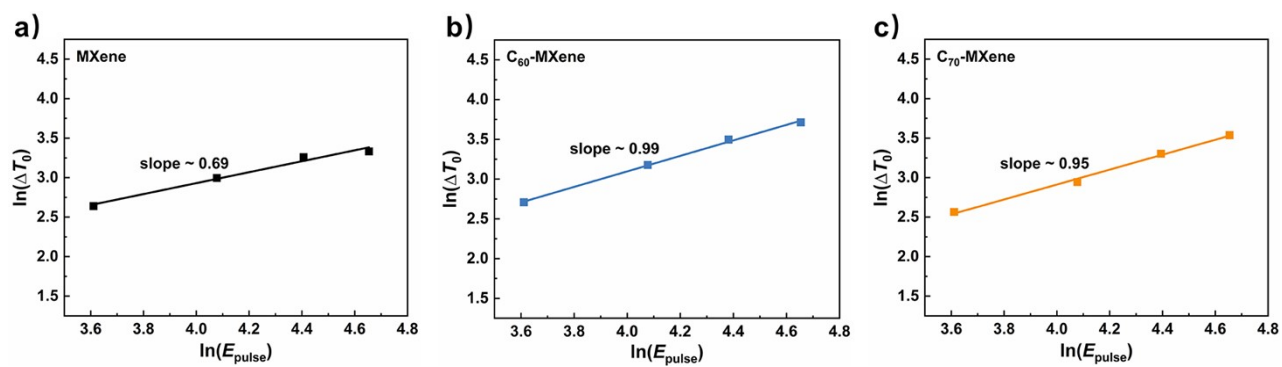

**Figure S14.** The relationship between  $\Delta T_0$  and  $E_{\text{pulse}}$  in ln-ln scale for a) MXene, b) C<sub>60</sub>-MXene, and c) C<sub>70</sub>-MXene based on the Z-scan data under the ns laser irradiation.

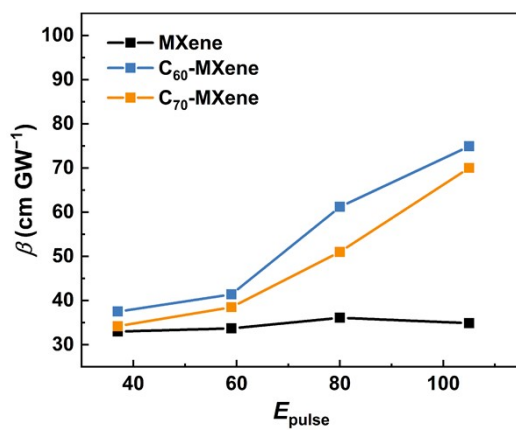

**Figure S15.** Variation of  $\beta$  of MXene,  $\text{C}_{60}$ -MXene, and  $\text{C}_{70}$ -MXene at ns pulses excitation with different  $E_{\text{pulse}}$ .

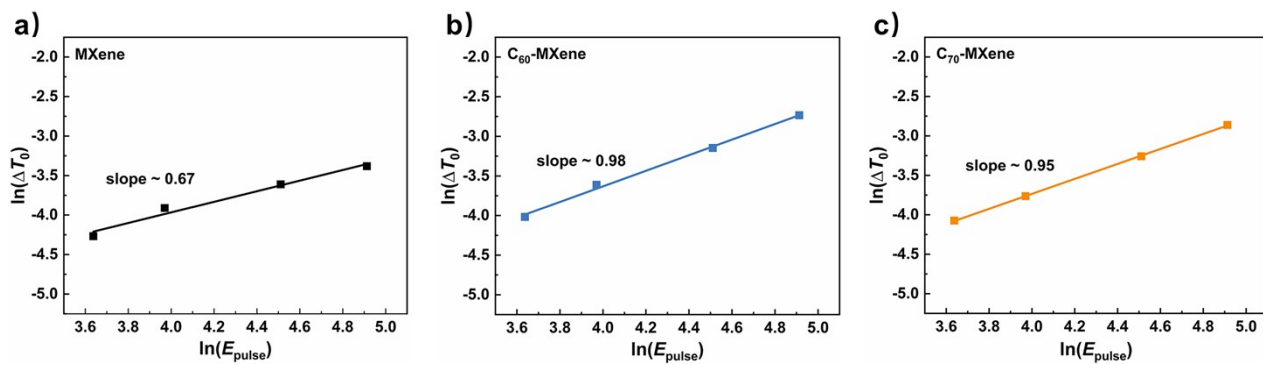

**Figure S16.** The relationship between  $\Delta T_0$  and  $E_{\text{pulse}}$  in ln-ln scale for a) MXene, b) C<sub>60</sub>-MXene, and c) C<sub>70</sub>-MXene based on the Z-scan data under the fs laser irradiation.

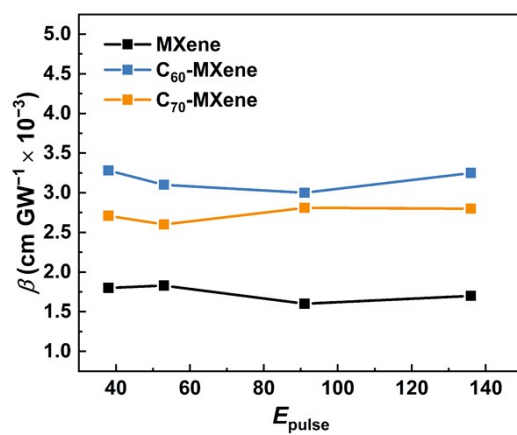

**Figure S17.** Variation of  $\beta$  of MXene, C<sub>60</sub>-MXene, and C<sub>70</sub>-MXene at fs pulses excitation with different  $E_{\text{pulse}}$ .

## References

- [1] M. Sheikbaha, A. A. Said, T. H. Wei, D. J. Hagan and E. W. Vanstryland, Sensitive measurement of optical nonlinearities using a single beam, *IEEE J. Quantum Electron.*, 1990, **26**, 760-769.
- [2] H. Li, S. Chen, D. W. Boukhvalov, Z. Yu, M. G. Humphrey, Z. Huang and C. Zhang, Switching the Nonlinear Optical Absorption of Titanium Carbide MXene by Modulation of the Surface Terminations, *ACS Nano*, 2022, **16**, 394-404.
